# Supplementary material for: SMARCA4 Promotes Lineage Plasticity and Enzalutamide Resistance in Prostate Cancer by Regulating PROX1 via H3K27 Acetylation
Source: Research Square preprint supplement (doi:10.21203/rs.3.rs-8272309/v1), 2025-12-18
Supplement: Supplementary file 1 [file 589c051bb094f19dd5174d40.docx]

**Supplementary Figure 1**


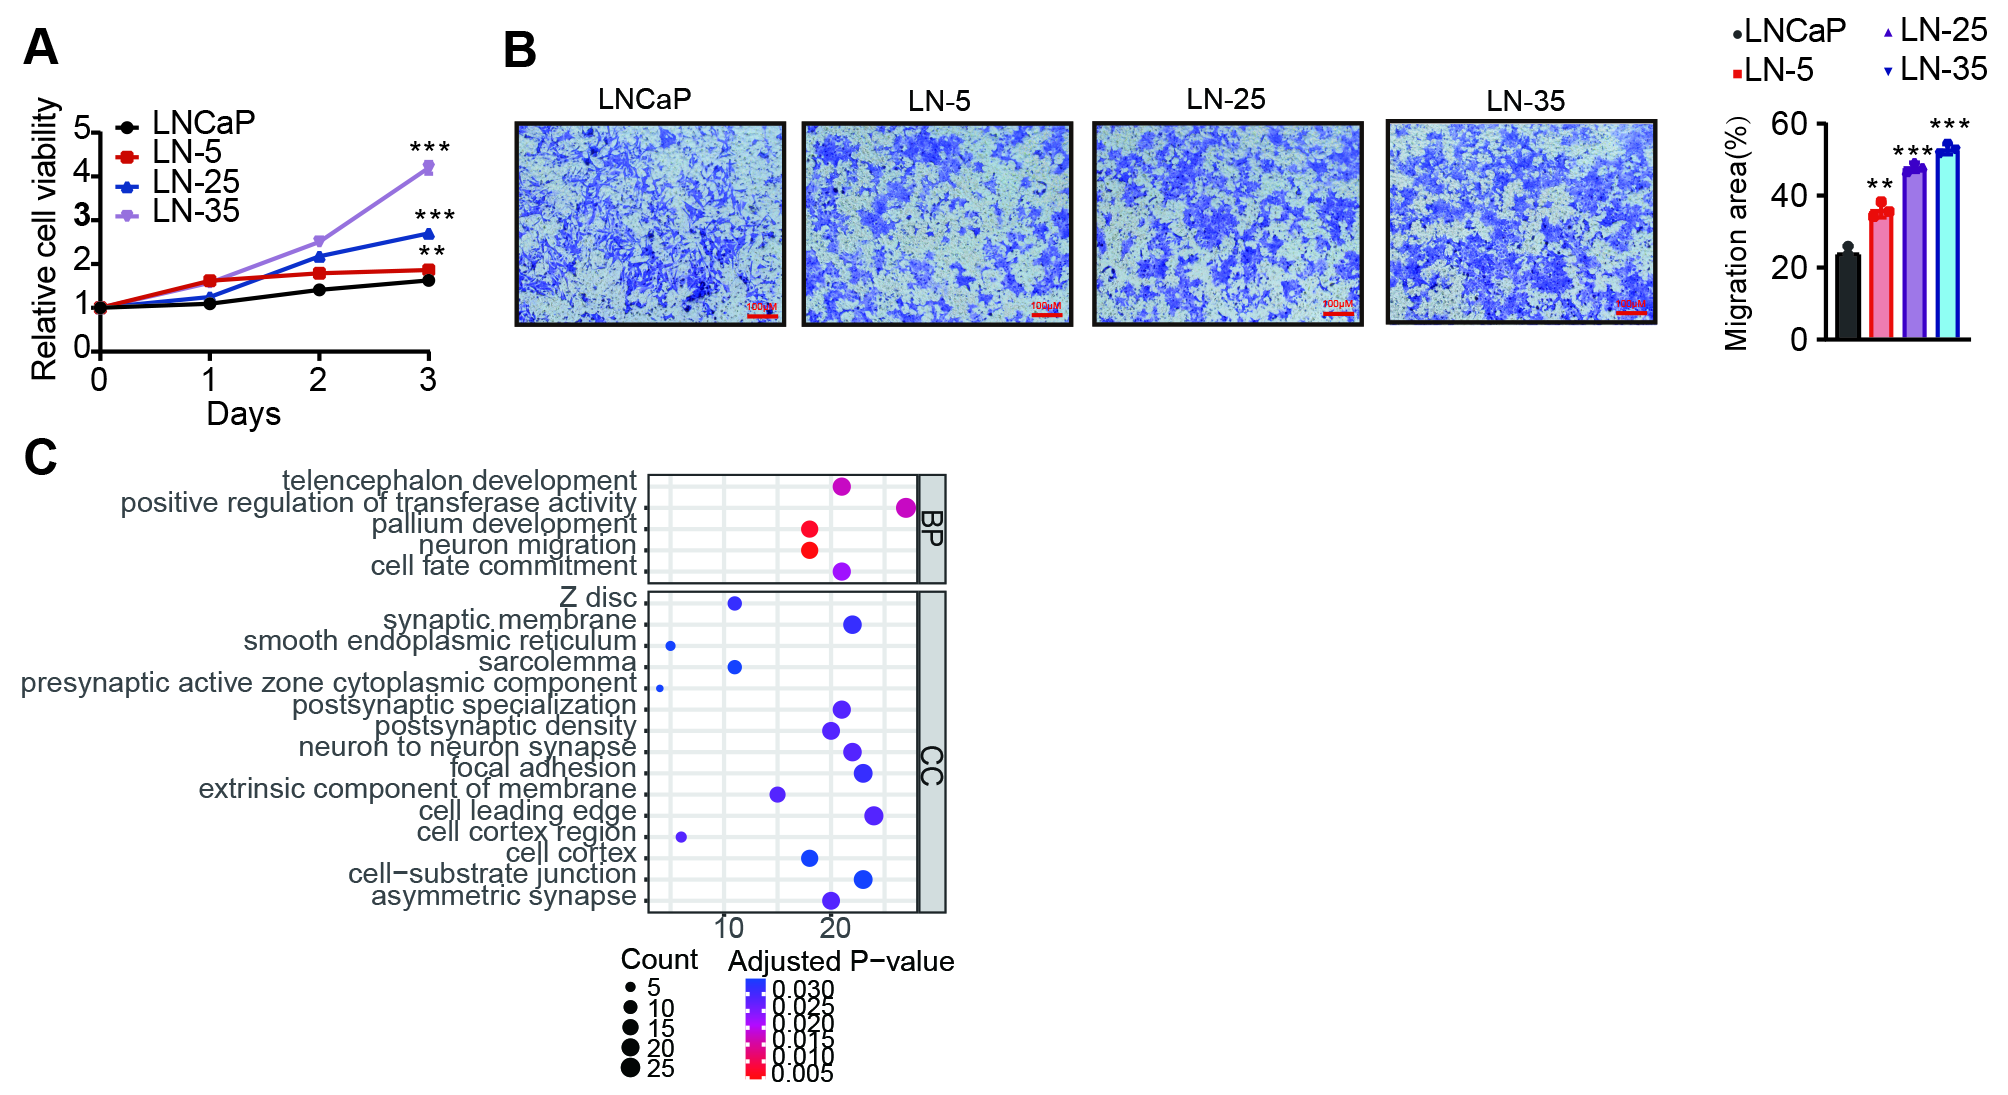


**Supplementary Figure 1.characterization of enzalutamide-resistant prostate cancer cell lines with varying resistance levels. (A)** Comparison of the proliferative capacity of LNCaP and resistant sublines. Cells were seeded at equal densities, and viability was assessed using the CCK-8 assay on Days 0, 1, 2, and 3. Data are presented as relative viability normalized to Day 0 (set as 100%). **(B)** Representative images of the Transwell migration assay and quantification of the percentage of area covered by migrated cells. (**C)** GO enrichment analysis of chromatin regions exhibiting increased accessibility in LN-35 cells. (*p < 0.05, **p < 0.01, ***p < 0.001).

**Supplementary Figure 2**


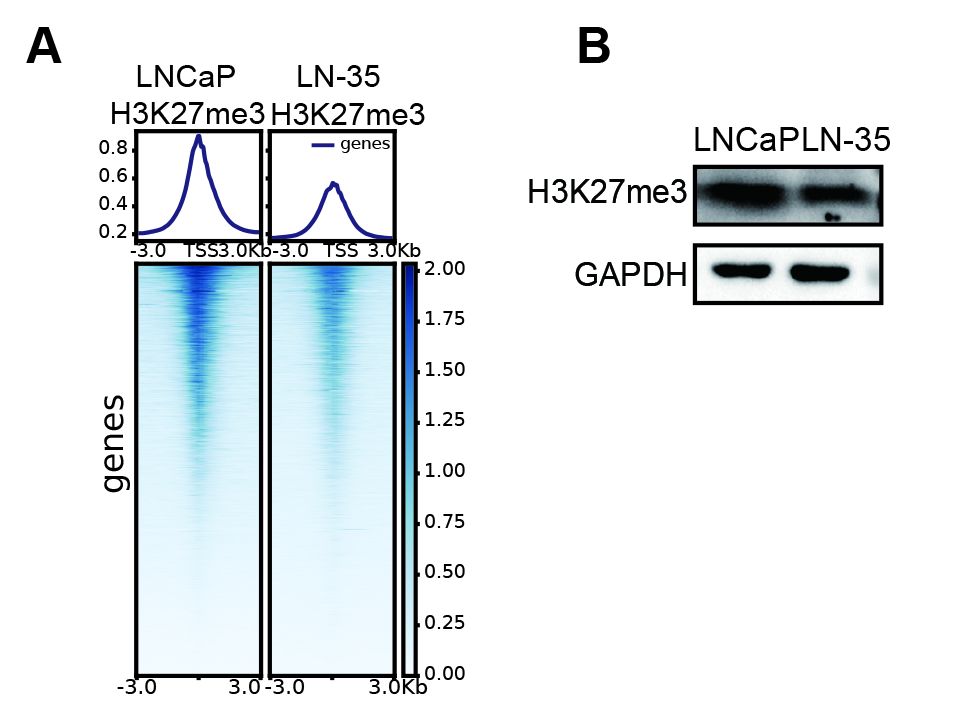


**Supplementary Figure 2. Less abundant of H3K27me3 in LN-35 cells. (A)** Comparison of the global H3K27me3 level between LNCaP and LN-35 cells. **(B)** The protein levels of H3K27me3 in LNCaP cells and LN-35 cells.

**Supplementary Figure 3**


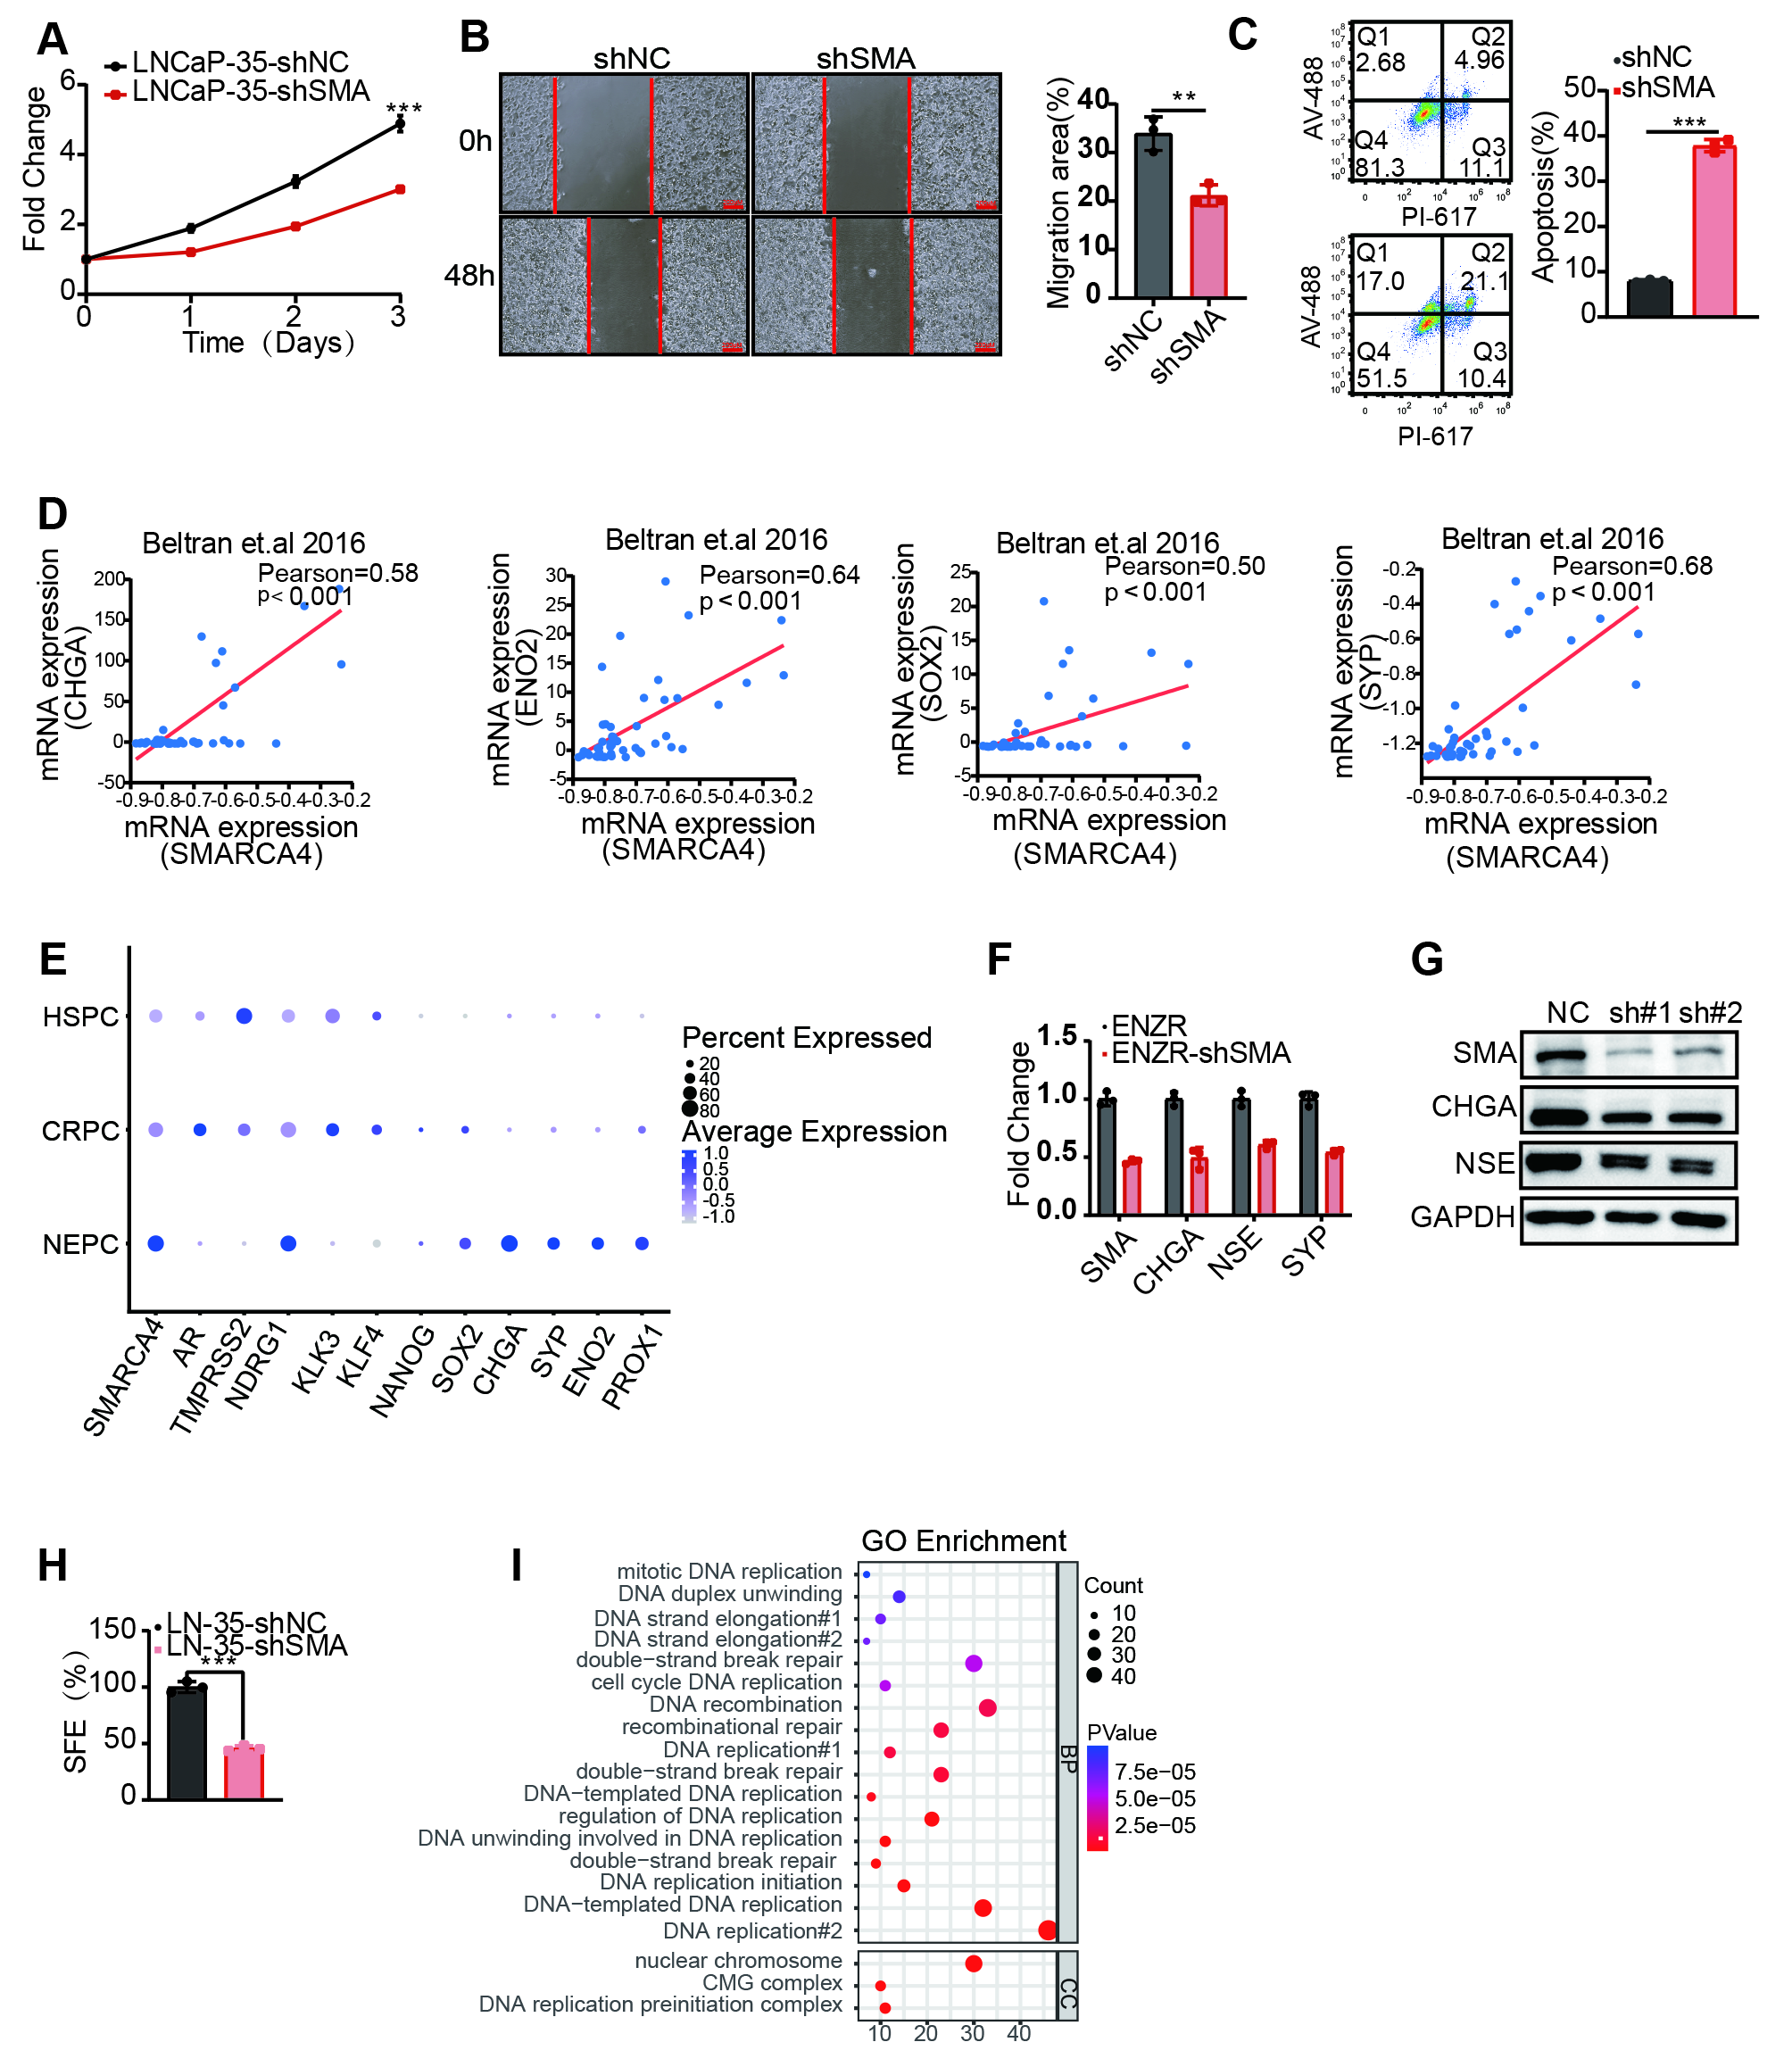


**Supplementary Figure 3. SMARCA4 promotes malignant phenotypes in prostate cancer. (A)** Proliferation kinetics of LN-35 cells following SMARCA4 knockdown, assessed by CCK-8 assay over a 4-day period (Days 0–3). Data are presented as fold change relative to Day 0. **(B)** Wound healing assay assessing the migration ability of LN-35 cells following SMARCA4 knockdown. Left: Representative images acquired at 0 and 48 hours. Right: Quantification of the wound closure rate, calculated as the ratio of migration distance at 48 hours to the initial wound width. **(C)** Flow cytometry analysis of apoptotic cells in control and SMARCA4-knockdown LN-35 cells. **(D)** Correlation analysis between SMARCA4 mRNA expression and NE gene in the GSE77930 dataset. **(E)** The enrichment of SMARCA4 and neuroendocrine marker expression across NEPC samples in the GSE264573 cohort. **(F, G)** mRNA (F) and protein (G) levels of NE markers in LN-35 cells following SMARCA4 knockdown. **(H)** Quantification of tumor sphere formation in control versus SMARCA4-knockdown LN-35 cells. **(I)** GO enrichment analysis of transcriptomic alterations in SMARCA4-knockdown LN-35 cells. (*p < 0.05, **p < 0.01, ***p < 0.001).
